# Supplementary material
Source: publisher figshare collection journal article supplement (https://tandf.figshare.com/articles/dataset/_/1267368)
Supplement: Supplementary file 1 [file 2]

# The Glacial Geomorphology of the Altai and Western Sayan mountains, Central Asia - Supplementary material

## Data

All geographic data that was used as a basis for the mapping or as background data in the final map was downloaded from USGS' Earth Explorer platform ([www.usgs.earthexplorer.com](http://www.usgs.earthexplorer.com)) or the Global Land Ice Measurements from Space (GLIMS) website (<http://www.glims.org/RGI/andolph.html>) Table S1, S2, S3 and S4 summarize the data sets and their respective entities. The authors have also supplied the acquired glacial geomorphological data (as a series of shp- and kml files, Table S5) used in the production of the map.

*Table S1. Landsat 7 ETM+ imagery used in this study to map the glacial geomorphology of the Altai and Western Sayan mountains. All images were downloaded from USGS - Earth Explorer (2012-13). The images are originally fixed to the Universal Transverse Mercator (UTM) map projection and coordinate system and the World Geodetic System 1984 (WGS84) datum. All image bands have been individually resampled, using a nearest neighbour algorithm. WRS = World Reference System.*

| Entity ID           | WRS<br>Path | WRS<br>Row | Acquisition<br>date | Satellite | Sensor |
|---------------------|-------------|------------|---------------------|-----------|--------|
| p139r026_7t20010823 | 139         | 026        | 2001-08-23          | Landsat 7 | ETM+   |
| p139r028_7t20000905 | 139         | 028        | 2000-09-05          | Landsat 7 | ETM+   |
| p140r023_7t19990708 | 140         | 023        | 1999-07-08          | Landsat 7 | ETM+   |
| p140r024_7t20020716 | 140         | 024        | 2002-07-16          | Landsat 7 | ETM+   |
| p140r027_7t20000827 | 140         | 027        | 2000-08-27          | Landsat 7 | ETM+   |

|                     |     |     |            |           |      |
|---------------------|-----|-----|------------|-----------|------|
| p140r028_7t20000827 | 140 | 028 | 2000-08-27 | Landsat 7 | ETM+ |
| p141r023_7t19990917 | 141 | 023 | 1999-09-17 | Landsat 7 | ETM+ |
| p141r024_7t20020808 | 141 | 024 | 2002-08-08 | Landsat 7 | ETM+ |
| p141r026_7t20020808 | 141 | 026 | 2002-08-08 | Landsat 7 | ETM+ |
| p141r027_7t20020808 | 141 | 027 | 2002-08-08 | Landsat 7 | ETM+ |
| p141r028_7t20020808 | 141 | 028 | 2002-08-08 | Landsat 7 | ETM+ |
| p142r023_7t20000910 | 142 | 023 | 2000-09-10 | Landsat 7 | ETM+ |
| p142r024_7t20000910 | 142 | 024 | 2000-09-10 | Landsat 7 | ETM+ |
| p142r025_7t20000910 | 142 | 025 | 2000-09-10 | Landsat 7 | ETM+ |
| p142r026_7t20020714 | 142 | 026 | 2002-07-14 | Landsat 7 | ETM+ |
| p142r027_7t20020714 | 142 | 027 | 2002-07-14 | Landsat 7 | ETM+ |
| p143r024_7t20010904 | 143 | 024 | 2001-09-04 | Landsat 7 | ETM+ |
| p143r025_7t20010904 | 143 | 025 | 2001-09-04 | Landsat 7 | ETM+ |
| p143r026_7t20010904 | 143 | 026 | 2001-09-04 | Landsat 7 | ETM+ |
| p143r027_7t19991017 | 143 | 027 | 1999-10-17 | Landsat 7 | ETM+ |
| p144r024_7t20010927 | 144 | 024 | 2001-09-27 | Landsat 7 | ETM+ |
| p144r025_7t20000722 | 144 | 025 | 2000-07-22 | Landsat 7 | ETM+ |
| p144r026_7t20000807 | 144 | 026 | 2000-08-07 | Landsat 7 | ETM+ |
| p145r024_7t20010817 | 145 | 024 | 2001-08-17 | Landsat 7 | ETM+ |
| p145r025_7t20000627 | 145 | 025 | 2000-06-27 | Landsat 7 | ETM+ |
| p145r026_7t20000627 | 145 | 026 | 2000-06-27 | Landsat 7 | ETM+ |
| p146r025_7t20000906 | 146 | 025 | 2000-09-06 | Landsat 7 | ETM+ |

---

*Table S2. The Shuttle radar topographic mission Water Body dataset (SWBD) was used as background data on the final map product. All SWDB datasets were downloaded from USGS - Earth Explorer (2012-13). The individual shp-files have a resolution of one arc second (approx. 30-meter). The SRTM Water Body Data files are a by-product of the data editing performed by the National Geospatial-Intelligence Agency (NGA) to produce the finished SRTM Digital Terrain Elevation Data Level 2 (DTED® 2) (Arendt et al., 2012).*

| Entity ID    | Acquisition<br>date | Entity ID    | Acquisition<br>date |
|--------------|---------------------|--------------|---------------------|
| SWBDE082N49E | 2000-02-01          | SWBDE089N48E | 2000-02-01          |
| SWBDE082N50E | 2000-02-01          | SWBDE089N49E | 2000-02-01          |
| SWBDE083N48E | 2000-02-01          | SWBDE089N50E | 2000-02-01          |
| SWBDE083N49E | 2000-02-01          | SWBDE089N51E | 2000-02-01          |
| SWBDE083N50E | 2000-02-01          | SWBDE089N52E | 2000-02-01          |
| SWBDE083N51E | 2000-02-01          | SWBDE082N53E | 2000-02-01          |
| SWBDE084N48E | 2000-02-01          | SWBDE089N54E | 2000-02-01          |
| SWBDE084N49E | 2000-02-01          | SWBDE089N55E | 2000-02-01          |
| SWBDE084N50E | 2000-02-01          | SWBDE090N46E | 2000-02-01          |
| SWBDE084N51E | 2000-02-01          | SWBDE090N47E | 2000-02-01          |
| SWBDE084N52E | 2000-02-01          | SWBDE090N48E | 2000-02-01          |
| SWBDE085N48E | 2000-02-01          | SWBDE090N49E | 2000-02-01          |
| SWBDE085N49E | 2000-02-01          | SWBDE090N50E | 2000-02-01          |
| SWBDE085N50E | 2000-02-01          | SWBDE090N51E | 2000-02-01          |
| SWBDE085N51E | 2000-02-01          | SWBDE090N52E | 2000-02-01          |
| SWBDE085N52E | 2000-02-01          | SWBDE090N53E | 2000-02-01          |
| SWBDE086N47E | 2000-02-01          | SWBDE090N54E | 2000-02-01          |

|              |            |              |            |
|--------------|------------|--------------|------------|
| SWBDE086N48E | 2000-02-01 | SWBDE091N46E | 2000-02-01 |
| SWBDE086N49E | 2000-02-01 | SWBDE091N47E | 2000-02-01 |
| SWBDE086N51E | 2000-02-01 | SWBDE091N48E | 2000-02-01 |
| SWBDE086N52E | 2000-02-01 | SWBDE091N49E | 2000-02-01 |
| SWBDE086N53E | 2000-02-01 | SWBDE091N50E | 2000-02-01 |
| SWBDE086N54E | 2000-02-01 | SWBDE091N51E | 2000-02-01 |
| SWBDE086N55E | 2000-02-01 | SWBDE091N52E | 2000-02-01 |
| SWBDE086N56E | 2000-02-01 | SWBDE091N53E | 2000-02-01 |
| SWBDE087N47E | 2000-02-01 | SWBDE092N46E | 2000-02-01 |
| SWBDE087N48E | 2000-02-01 | SWBDE092N47E | 2000-02-01 |
| SWBDE087N49E | 2000-02-01 | SWBDE092N48E | 2000-02-01 |
| SWBDE087N50E | 2000-02-01 | SWBDE092N49E | 2000-02-01 |
| SWBDE087N51E | 2000-02-01 | SWBDE092N50E | 2000-02-01 |
| SWBDE087N52E | 2000-02-01 | SWBDE092N51E | 2000-02-01 |
| SWBDE087N53E | 2000-02-01 | SWBDE092N52E | 2000-02-01 |
| SWBDE087N54E | 2000-02-01 | SWBDE092N53E | 2000-02-01 |
| SWBDE087N55E | 2000-02-01 | SWBDE093N46E | 2000-02-01 |
| SWBDE087N56E | 2000-02-01 | SWBDE093N47E | 2000-02-01 |
| SWBDE088N46E | 2000-02-01 | SWBDE093N50E | 2000-02-01 |
| SWBDE088N47E | 2000-02-01 | SWBDE093N51E | 2000-02-01 |
| SWBDE088N48E | 2000-02-01 | SWBDE093N52E | 2000-02-01 |
| SWBDE088N49E | 2000-02-01 | SWBDE093N53E | 2000-02-01 |
| SWBDE088N50E | 2000-02-01 | SWBDE094N50E | 2000-02-01 |

|              |            |              |            |
|--------------|------------|--------------|------------|
| SWBDE088N51E | 2000-02-01 | SWBDE094N51E | 2000-02-01 |
| SWBDE088N52E | 2000-02-01 | SWBDE094N52E | 2000-02-01 |
| SWBDE088N53E | 2000-02-01 | SWBDE094N53E | 2000-02-01 |
| SWBDE088N54E | 2000-02-01 | SWBDE095N51E | 2000-02-01 |
| SWBDE088N55E | 2000-02-01 | SWBDE095N52E | 2000-02-01 |
| SWBDE089N46E | 2000-02-01 | SWBDE095N53E | 2000-02-01 |
| SWBDE089N47E | 2000-02-01 |              |            |

---

*Table S3. The Advanced Spaceborne Thermal Emission and Reflection Radiometer (ASTER) Global Digital Elevation Model (AGDEM) was used to aid mapping of glacial geomorphology in the Altai and Western Sayan mountains and is also used as background data on the final map product. All AGDEM datasets were downloaded from USGS - Earth Explorer (2012-13). The AGDEM data is posted on a 1 arc-second (approximately 30 m at the equator) grid and referenced to the 1984 World Geodetic System (WGS84)/ 1996 Earth Gravitational Model (EGM96) geoid. The U.S. National Aeronautics and Space Administration (NASA) and Japan's Ministry of Economy, Trade, and Industry (METI) developed the AGDEM data jointly. A single-scene (60 x 60 km) digital elevation model (DEM) has a vertical (RMSE) accuracy generally between 10- and 25 m (Arendt et al., 2012).*

| Entity ID         | Acquisition<br>date | Entity ID         | Acquisition<br>date |
|-------------------|---------------------|-------------------|---------------------|
| ASTGDEM2_0N46E087 | 2011-10-17          | ASTGDEM2_0N50E089 | 2011-10-17          |
| ASTGDEM2_0N46E088 | 2011-10-17          | ASTGDEM2_0N50E090 | 2011-10-17          |
| ASTGDEM2_0N46E089 | 2011-10-17          | ASTGDEM2_0N50E091 | 2011-10-17          |
| ASTGDEM2_0N46E090 | 2011-10-17          | ASTGDEM2_0N50E092 | 2011-10-17          |
| ASTGDEM2_0N46E091 | 2011-10-17          | ASTGDEM2_0N50E093 | 2011-10-17          |
| ASTGDEM2_0N46E092 | 2011-10-17          | ASTGDEM2_0N50E094 | 2011-10-17          |

|                   |            |                   |            |
|-------------------|------------|-------------------|------------|
| ASTGDEM2_0N46E093 | 2011-10-17 | ASTGDEM2_0N50E095 | 2011-10-17 |
| ASTGDEM2_0N46E094 | 2011-10-17 | ASTGDEM2_0N51E083 | 2011-10-17 |
| ASTGDEM2_0N46E095 | 2011-10-17 | ASTGDEM2_0N51E084 | 2011-10-17 |
| ASTGDEM2_0N47E085 | 2011-10-17 | ASTGDEM2_0N51E085 | 2011-10-17 |
| ASTGDEM2_0N47E086 | 2011-10-17 | ASTGDEM2_0N51E086 | 2011-10-17 |
| ASTGDEM2_0N47E087 | 2011-10-17 | ASTGDEM2_0N51E087 | 2011-10-17 |
| ASTGDEM2_0N47E088 | 2011-10-17 | ASTGDEM2_0N51E088 | 2011-10-17 |
| ASTGDEM2_0N47E089 | 2011-10-17 | ASTGDEM2_0N51E089 | 2011-10-17 |
| ASTGDEM2_0N47E090 | 2011-10-17 | ASTGDEM2_0N51E090 | 2011-10-17 |
| ASTGDEM2_0N47E091 | 2011-10-17 | ASTGDEM2_0N51E091 | 2011-10-17 |
| ASTGDEM2_0N47E092 | 2011-10-17 | ASTGDEM2_0N51E092 | 2011-10-17 |
| ASTGDEM2_0N47E093 | 2011-10-17 | ASTGDEM2_0N51E093 | 2011-10-17 |
| ASTGDEM2_0N47E094 | 2011-10-17 | ASTGDEM2_0N51E094 | 2011-10-17 |
| ASTGDEM2_0N47E095 | 2011-10-17 | ASTGDEM2_0N51E095 | 2011-10-17 |
| ASTGDEM2_0N48E083 | 2011-10-17 | ASTGDEM2_0N52E083 | 2011-10-17 |
| ASTGDEM2_0N48E084 | 2011-10-17 | ASTGDEM2_0N52E084 | 2011-10-17 |
| ASTGDEM2_0N48E085 | 2011-10-17 | ASTGDEM2_0N52E085 | 2011-10-17 |
| ASTGDEM2_0N48E086 | 2011-10-17 | ASTGDEM2_0N52E086 | 2011-10-17 |
| ASTGDEM2_0N48E087 | 2011-10-17 | ASTGDEM2_0N52E087 | 2011-10-17 |
| ASTGDEM2_0N48E088 | 2011-10-17 | ASTGDEM2_0N52E088 | 2011-10-17 |
| ASTGDEM2_0N48E089 | 2011-10-17 | ASTGDEM2_0N52E089 | 2011-10-17 |
| ASTGDEM2_0N48E090 | 2011-10-17 | ASTGDEM2_0N52E090 | 2011-10-17 |
| ASTGDEM2_0N48E091 | 2011-10-17 | ASTGDEM2_0N52E091 | 2011-10-17 |

|                   |            |                   |            |
|-------------------|------------|-------------------|------------|
| ASTGDEM2_0N48E092 | 2011-10-17 | ASTGDEM2_0N52E092 | 2011-10-17 |
| ASTGDEM2_0N48E093 | 2011-10-17 | ASTGDEM2_0N52E093 | 2011-10-17 |
| ASTGDEM2_0N48E094 | 2011-10-17 | ASTGDEM2_0N52E094 | 2011-10-17 |
| ASTGDEM2_0N48E095 | 2011-10-17 | ASTGDEM2_0N52E095 | 2011-10-17 |
| ASTGDEM2_0N49E082 | 2011-10-17 | ASTGDEM2_0N53E086 | 2011-10-17 |
| ASTGDEM2_0N49E083 | 2011-10-17 | ASTGDEM2_0N53E087 | 2011-10-17 |
| ASTGDEM2_0N49E084 | 2011-10-17 | ASTGDEM2_0N53E088 | 2011-10-17 |
| ASTGDEM2_0N49E085 | 2011-10-17 | ASTGDEM2_0N53E089 | 2011-10-17 |
| ASTGDEM2_0N49E086 | 2011-10-17 | ASTGDEM2_0N53E090 | 2011-10-17 |
| ASTGDEM2_0N49E087 | 2011-10-17 | ASTGDEM2_0N53E091 | 2011-10-17 |
| ASTGDEM2_0N49E088 | 2011-10-17 | ASTGDEM2_0N53E092 | 2011-10-17 |
| ASTGDEM2_0N49E089 | 2011-10-17 | ASTGDEM2_0N53E093 | 2011-10-17 |
| ASTGDEM2_0N49E090 | 2011-10-17 | ASTGDEM2_0N53E094 | 2011-10-17 |
| ASTGDEM2_0N49E091 | 2011-10-17 | ASTGDEM2_0N53E095 | 2011-10-17 |
| ASTGDEM2_0N49E092 | 2011-10-17 | ASTGDEM2_0N54E086 | 2011-10-17 |
| ASTGDEM2_0N49E093 | 2011-10-17 | ASTGDEM2_0N54E087 | 2011-10-17 |
| ASTGDEM2_0N49E094 | 2011-10-17 | ASTGDEM2_0N54E088 | 2011-10-17 |
| ASTGDEM2_0N49E095 | 2011-10-17 | ASTGDEM2_0N54E089 | 2011-10-17 |
| ASTGDEM2_0N50E082 | 2011-10-17 | ASTGDEM2_0N54E090 | 2011-10-17 |
| ASTGDEM2_0N50E083 | 2011-10-17 | ASTGDEM2_0N55E086 | 2011-10-17 |
| ASTGDEM2_0N50E084 | 2011-10-17 | ASTGDEM2_0N55E087 | 2011-10-17 |
| ASTGDEM2_0N50E085 | 2011-10-17 | ASTGDEM2_0N55E088 | 2011-10-17 |
| ASTGDEM2_0N50E086 | 2011-10-17 | ASTGDEM2_0N55E089 | 2011-10-17 |

|                   |            |                   |            |
|-------------------|------------|-------------------|------------|
| ASTGDEM2_0N50E087 | 2011-10-17 | ASTGDEM2_0N55E090 | 2011-10-17 |
| ASTGDEM2_0N50E088 | 2011-10-17 | ASTGDEM2_0N55E091 | 2011-10-17 |

*Table S4. The Randolph Glacier Inventory (RGI) is a globally complete inventory of glacier outlines (Arendt et al., 2012). It is supplemental to the Global Land Ice Measurements from Space initiative (GLIMS). This dataset was used as background data on the final map product.*

| Entity ID            | 1st-             | 2nd-Order-     | Name                     |
|----------------------|------------------|----------------|--------------------------|
|                      | Order-<br>Region | Region<br>Code |                          |
| 10_RGI30_NorthAsia   | 10               | 10-01          | North Asia (North)       |
|                      |                  | 10-02          | North Asia (East)        |
|                      |                  | 10-03          | Chukotka                 |
|                      |                  | 10-04          | Altay and Sayan          |
| 13_RGI30_CentralAsia | 13               | 13-02          | Hissar Alay              |
|                      |                  |                | Pamir (Safed Khirs/W     |
|                      |                  | 13-03          | Tarim)                   |
|                      |                  | 13-04          | W Tien Shan              |
|                      |                  | 13-05          | E Tien Shan (Dzhungaria) |
|                      |                  | 13-06          | W Kun Lun                |
|                      |                  | 13-07          | E Kun Lun (Altyn Tagh)   |
|                      |                  | 13-08          | Qilian Shan              |
|                      |                  | 13-09          | Inner Tibet              |
|                      |                  | 13-10          | S and E Tibet            |



*Table S5. Summary of datasets accompanying this paper. The data is compatible with ESRI ArcGIS and Google Earth©.*

| Name                     | Extension | Type     | Comment                  |
|--------------------------|-----------|----------|--------------------------|
| altai_map_extent         | dbf       | polygon  | Extent of map            |
| altai_map_extent         | prj       | polygon  | "                        |
| altai_map_extent         | sbn       | polygon  | "                        |
| altai_map_extent         | sbx       | polygon  | "                        |
| altai_map_extent         | shp       | polygon  | "                        |
| altai_map_extent         | shx       | polygon  | "                        |
| altai_marginal_moraine   | dbf       | polygon  | Distribution of moraines |
| altai_marginal_moraine   | prj       | polygon  | "                        |
| altai_marginal_moraine   | sbn       | polygon  | "                        |
| altai_marginal_moraine   | sbx       | polygon  | "                        |
| altai_marginal_moraine   | shp       | polygon  | "                        |
| altai_marginal_moraine   | shp.xml   | polygon  | "                        |
| altai_marginal_moraine   | shx       | polygon  | "                        |
|                          |           |          | Distribution of glacial  |
| altai_glacial_lineations | dbf       | polyline | lineations               |
| altai_glacial_lineations | prj       | polyline | "                        |
| altai_glacial_lineations | sbn       | polyline | "                        |
| altai_glacial_lineations | sbx       | polyline | "                        |

|                          |         |          |   |
|--------------------------|---------|----------|---|
| altai_glacial_lineations | shp     | polyline | " |
| altai_glacial_lineations | shp.xml | polyline | " |
| altai_glacial_lineations | shx     | polyline | " |

#### Distribution of hummocky

|                        |         |         |         |
|------------------------|---------|---------|---------|
| altai_hummocky_terrain | dbf     | polygon | terrain |
| altai_hummocky_terrain | prj     | polygon | "       |
| altai_hummocky_terrain | sbn     | polygon | "       |
| altai_hummocky_terrain | sbx     | polygon | "       |
| altai_hummocky_terrain | shp     | polygon | "       |
| altai_hummocky_terrain | shp.xml | polygon | "       |
| altai_hummocky_terrain | shx     | polygon | "       |

#### Distribution of glacial

|                      |         |         |         |
|----------------------|---------|---------|---------|
| altai_glacial_valley | dbf     | polygon | valleys |
| altai_glacial_valley | prj     | polygon | "       |
| altai_glacial_valley | sbn     | polygon | "       |
| altai_glacial_valley | sbx     | polygon | "       |
| altai_glacial_valley | shp     | polygon | "       |
| altai_glacial_valley | shp.xml | polygon | "       |
| altai_glacial_valley | shx     | polygon | "       |

## References

Arendt, A., Bolch, T., Cogley, J.G., Gardner, A., Hagen, J.-O., Hock, R., Kaser, G.,  
Pfeffer, W.T., Moholdt, G., Paul, F., Radić, V., Andreassen, L., Bajracharya, S.,  
Barrand, N., Beedle, M., Berthier, E., Bhambri, R., Bliss, A., Brown, I., Burgess,  
D., Burgess, E., Cawkwell, F., Chinn, T., Copland, L., Davies, B., De Angelis, H.,  
Dolgova, E., Filbert, K., Forester, R.R., Fountain, A., Frey, H., Giffen, B.,  
Glasser, N., Gurney, S., Hagg, W., Hall, D., Haritashya, U.K., Hartmann, G.,  
Helm, C., Herreid, S., Howat, I., Kapustin, G., Khromova, T., Kienholz, C.,  
Köönig, M., Kohler, J., Kriegel, D., Kutuzov, S., Lavrentiev, I., Le Bris, R., Lund,  
J., Manley, W., Mayer, C., Miles, E., Li, X., Menounos, B., Mercer, A., Mölg, N.,  
Mool, P., Nosenko, G., Negrete, A., Nuth, C., Pettersson, R., Racoviteanu, A.,  
Ranzi, R., Rastner, P., Rau, F., Raup, B., Rich, J., Rott, H., Schneider, C.,  
Seliverstov, Y., Sharp, M., Sigurðsson, O., Stokes, C., Wheate, R., Winsvold, S.,  
Wolken, G., Wyatt, F., & Zheltyhina, N. (2012). Randolph Glacier Inventory – a  
dataset of global glacier outlines: Version 3.2. Global Land Ice Measurements  
from Space, Boulder Colorado, USA. Digital Media.
