# Supplementary material
Source: publisher figshare collection journal article supplement (https://tandf.figshare.com/articles/dataset/_/1267368)
Supplement: Supplementary file 2 [file 2]

# Glacial Geomorphology of the Altai and western Sayan mountains, Central Asia

Robin Blomdin<sup>1,2,\*</sup>, Jakob Heyman<sup>2</sup>, Arjen P. Stroeven<sup>2</sup>, Clas Hättestrand<sup>2</sup>, Jonathan M. Harbor<sup>1,2</sup>, Natacha Gribenski<sup>2</sup>, Krister N. Jansson<sup>2</sup>, Dmitry A. Petrakov<sup>3</sup>, Mikhail N. Ivanov<sup>3</sup>, Orkhonselenge Alexander<sup>4</sup>, Alexei N. Rudoy<sup>5</sup> & Michael Walther<sup>6</sup>

<sup>1</sup> Department of Earth, Atmospheric, and Planetary Sciences, Purdue University, USA  
<sup>2</sup> Bolin Centre for Climate Research, Department of Physical Geography and Quaternary Geology, Stockholm University, Sweden  
<sup>3</sup> Faculty of Geography, Lomonosov Moscow State University, Russia  
<sup>4</sup> Department of Geography, School of Arts and Science, National University of Mongolia, Mongolia  
<sup>5</sup> Department of Geology and Geography, Tomsk State University, Russia  
<sup>6</sup> Mongolian Academy of Sciences, Geographical Institute, Ulaanbaatar, Mongolia

\* Corresponding cartographer [rblomdin@purdue.edu](mailto:rblomdin@purdue.edu); [robin.blomdin@natgeo.su.se](mailto:robin.blomdin@natgeo.su.se)

## Legend

Glacial valley

Marginal moraine

Hummocky terrain

Glacial lineations

Glacier

5200

0 m a.s.l.

Lake

River

National boundary

Major road

Major settlement

Peak and altitude (m a.s.l.)

Scale 1: 1,000,000

0 50 100 150 km

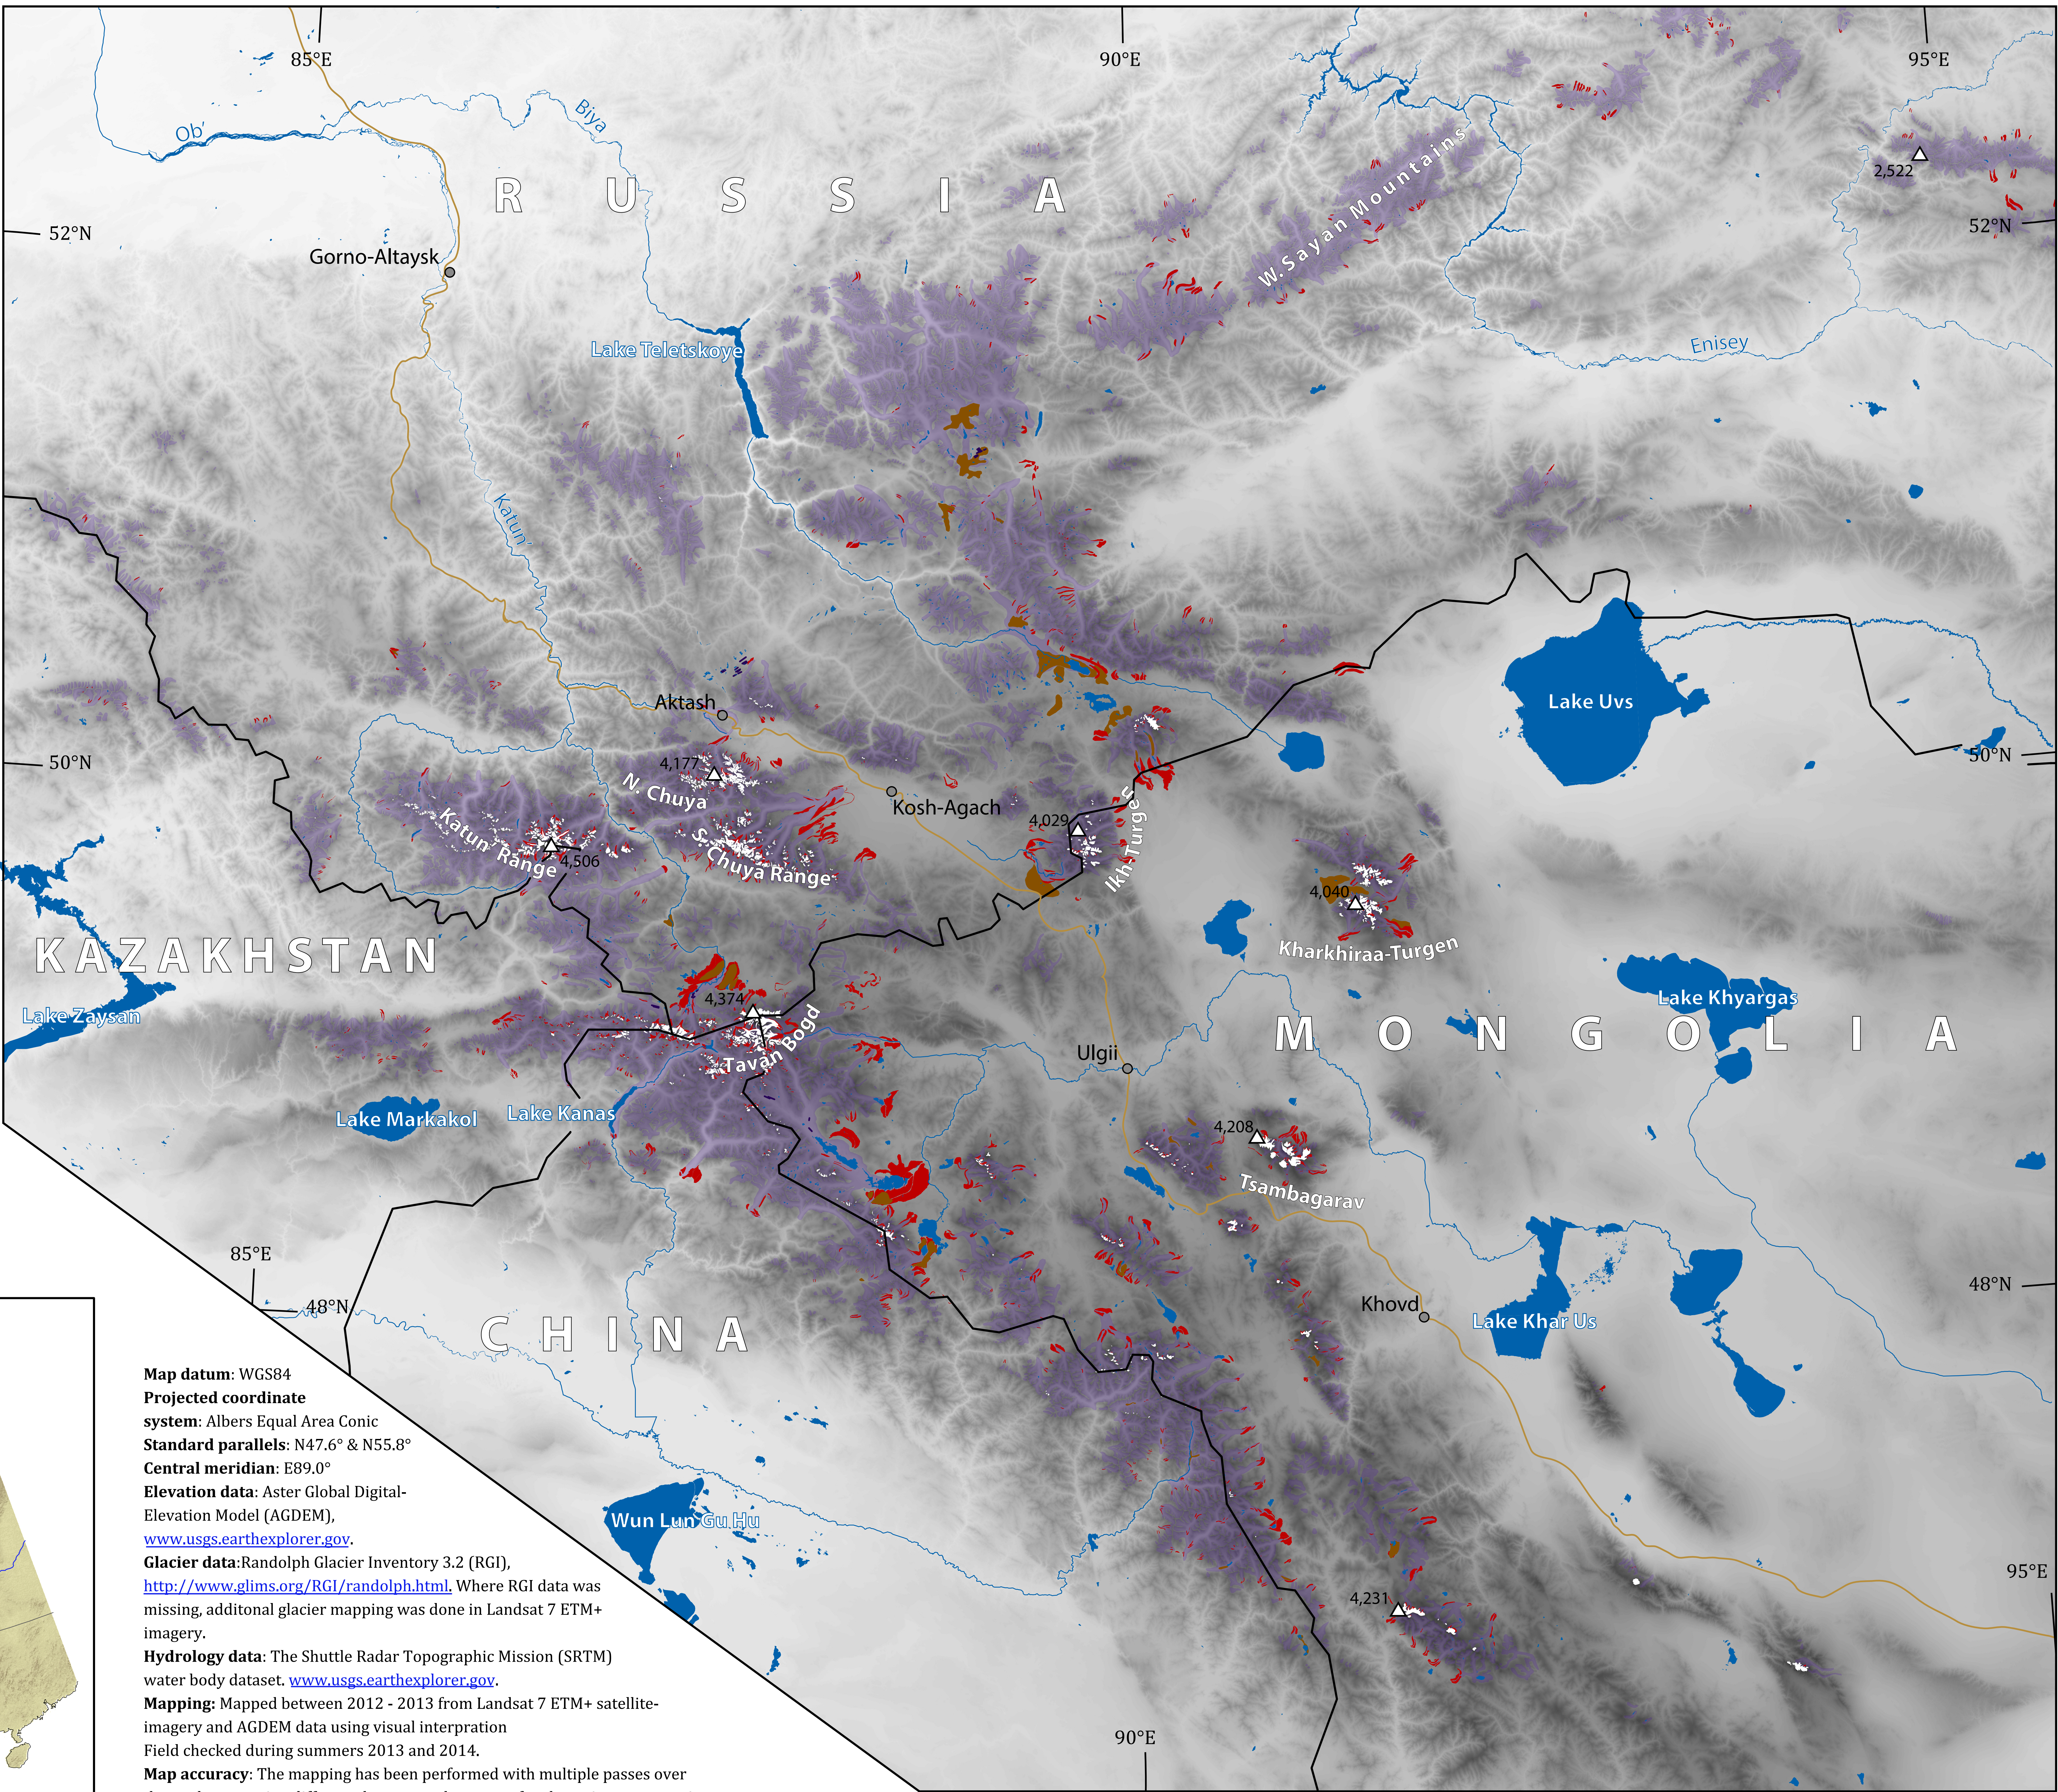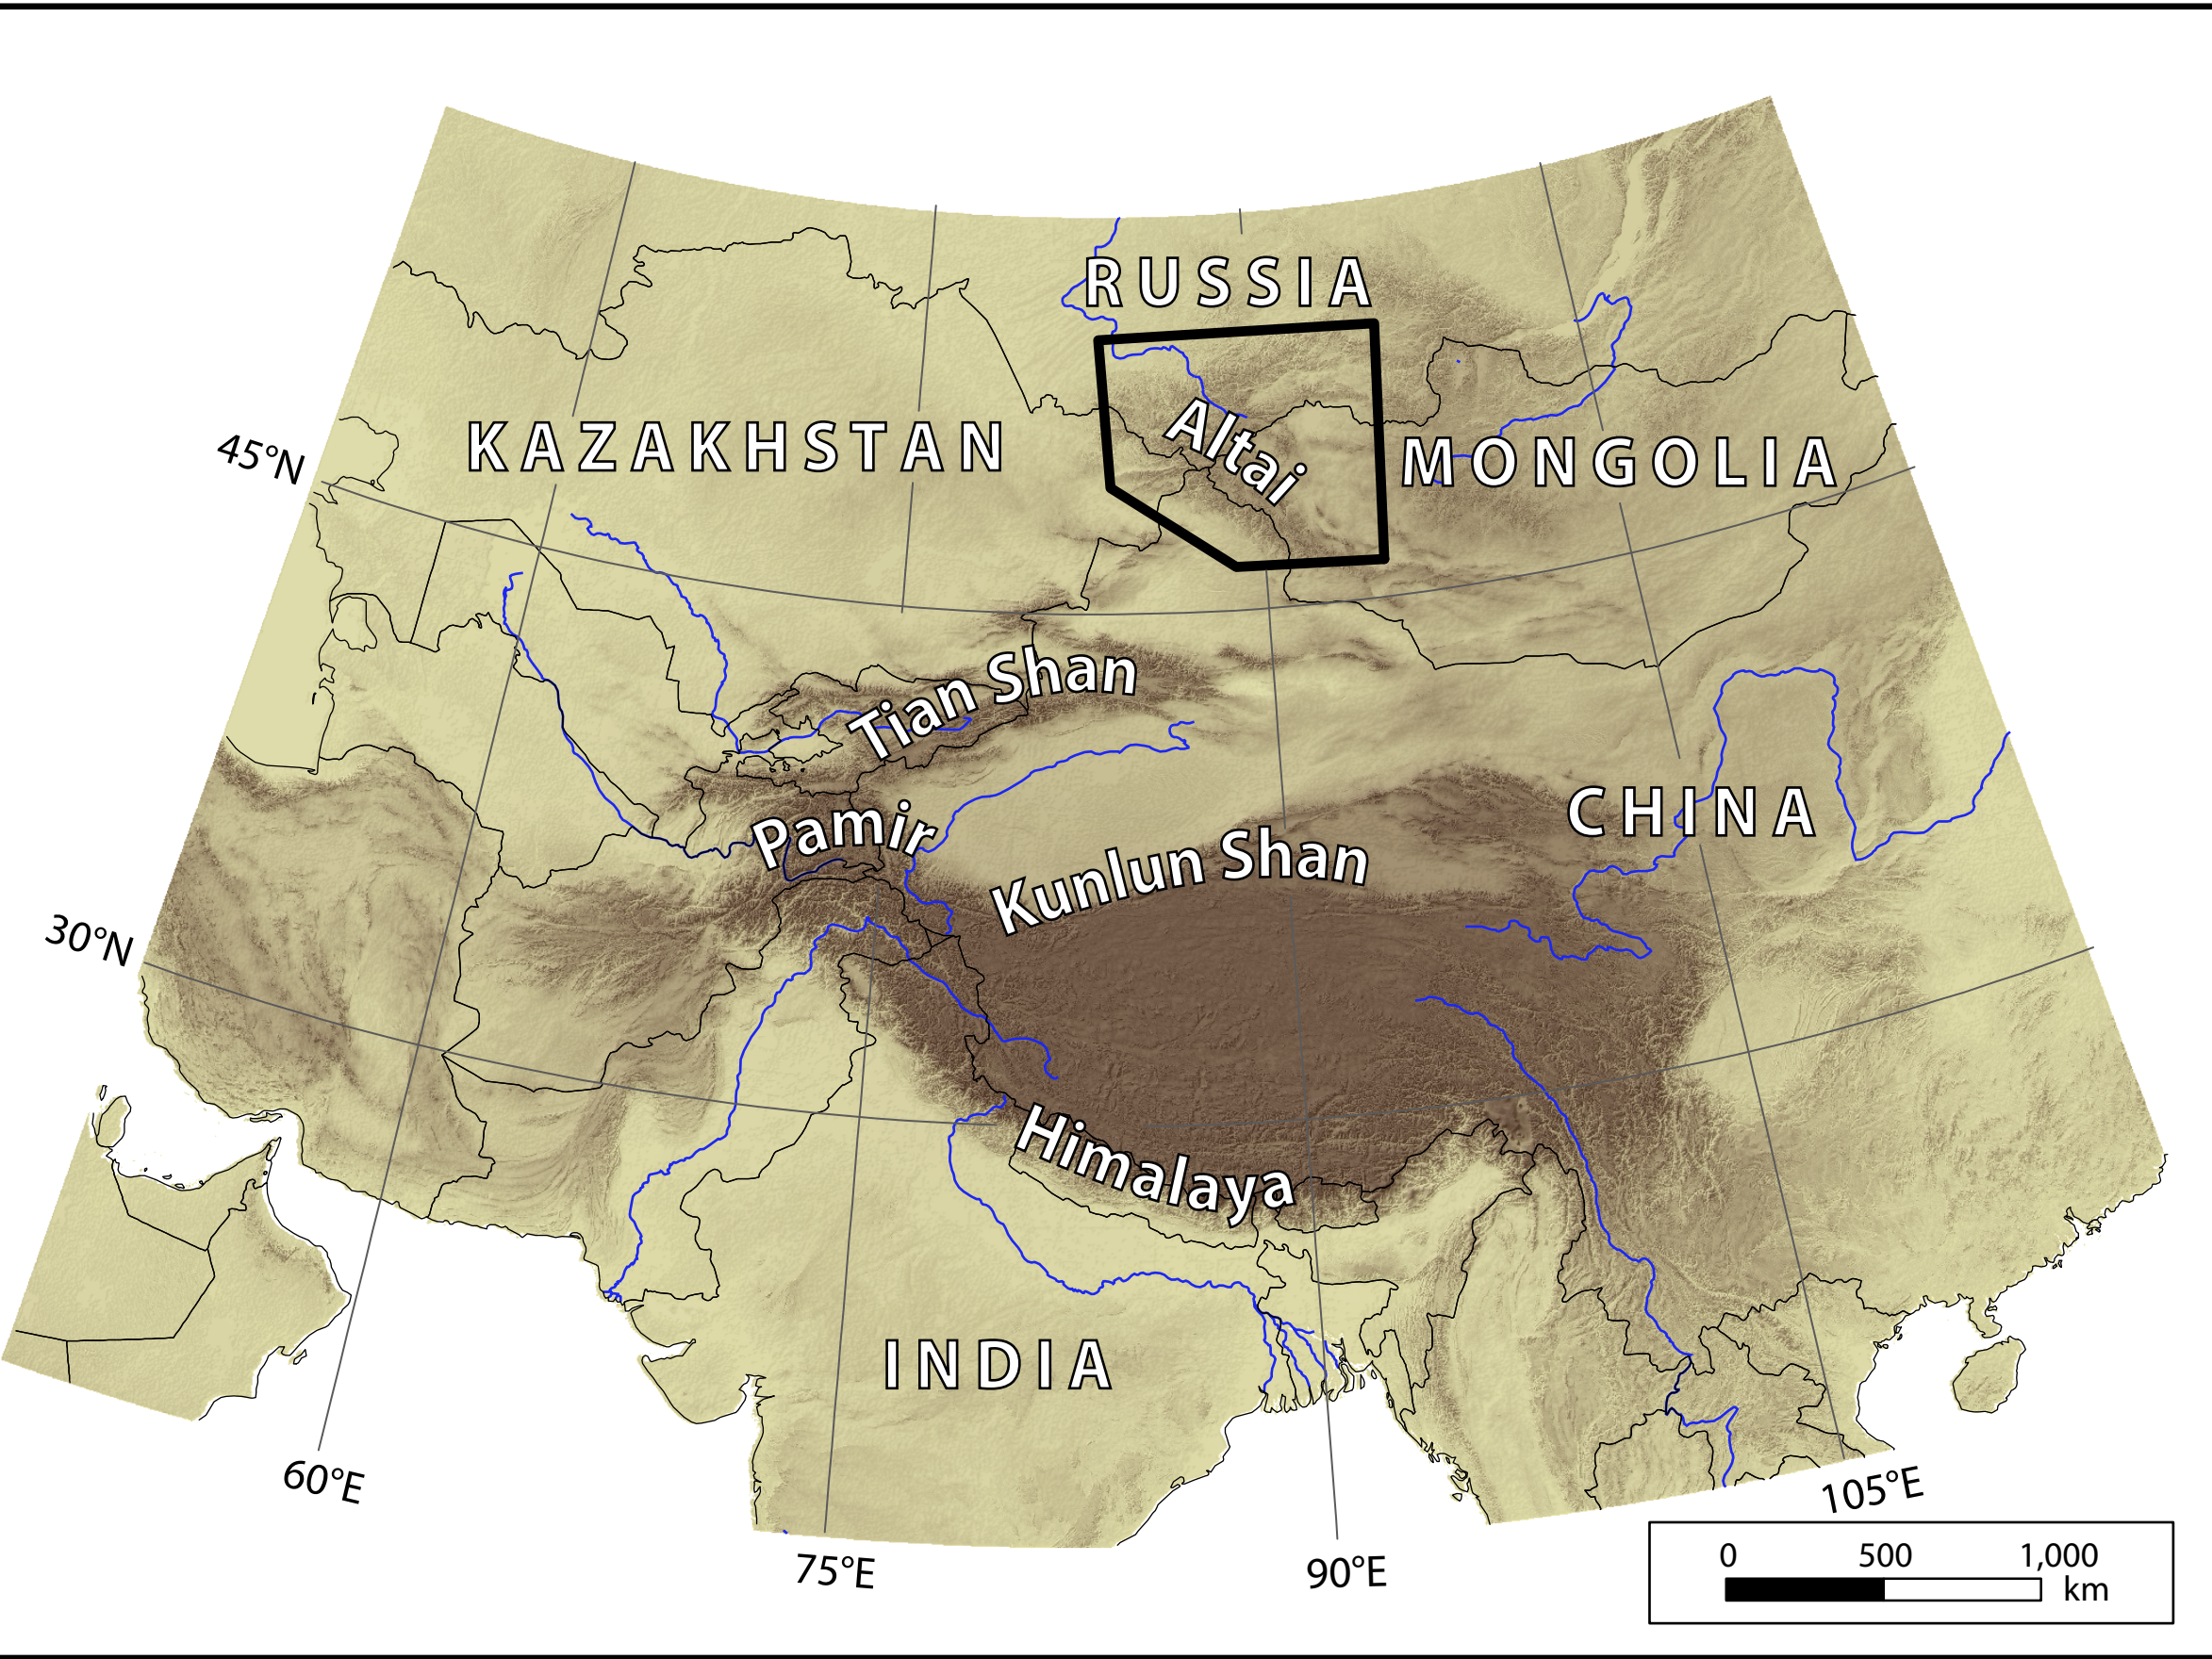

**Map datum:** WGS84  
**Projected coordinate system:** Albers Equal Area Conic  
**Standard parallels:** N47.6° & N55.8°  
**Central meridian:** E89.0°  
**Elevation data:** Aster Global Digital Elevation Model (AGDEM), [www.usgs.earthexplorer.gov](http://www.usgs.earthexplorer.gov).  
**Glacier data:** Randolph Glacier Inventory 3.2 (RGI), <http://www.glims.org/RGI/randolph.html>. Where RGI data was missing, additional glacier mapping was done in Landsat 7 ETM+ imagery.  
**Hydrology data:** The Shuttle Radar Topographic Mission (SRTM) water body dataset. [www.usgs.earthexplorer.gov](http://www.usgs.earthexplorer.gov).  
**Mapping:** Mapped between 2012 - 2013 from Landsat 7 ETM+ satellite imagery and AGDEM data using visual interpretation. Field checked during summers 2013 and 2014.  
**Map accuracy:** The mapping has been performed with multiple passes over the study area using different datasets and a range of scales to increase consistency. The resolution of the Landsat 7 ETM+ imagery is about 30 m for the colour bands and 15 m for the panchromatic band (number 8). The resolution of the AGDEM is also 30 m; hence landforms smaller than 30 m have not been mapped.
